# Supplementary material
Source: MDPI journal article supplement (https://www.mdpi.com/2073-4395/13/6/1512)
Supplement: s1 [file s1]

**Table S1:** Selected physicochemical characteristics of the soil and the biochars used in this study. WBC = wood-derived biochar; MBC = manure-derived biochar. All analyses were performed on a dry matter basis except for moisture, ash, fixed carbon, and volatile matter.

| Parameter (unit)          | Soil  | WBC     | MBC      |
|---------------------------|-------|---------|----------|
| pH                        | 7.4   | 8.8     | 10.2     |
| EC (µmho/cm)              | 245   | 477     | 13260    |
| C                         | -     | 0.857   | 0.613    |
| H                         | -     | 0.013   | 0.007    |
| O                         | -     | 0.066   | 0.055    |
| N (%)                     | 0.003 | 0.003   | 0.010    |
| P (%)                     | 0.001 | 0.000   | 0.014    |
| K (%)                     | 0.014 | 0.003   | 0.017    |
| Ca (%)                    | 0.12  | 0.004   | 0.046    |
| Mg (%)                    | 0.009 | 0.001   | 0.019    |
| S (ppm)                   | 6.000 | 29.910  | 854.725  |
| Na (%)                    | 2.000 | 0.001   | 0.004    |
| Fe (ppm)                  | 1.67  | 904.310 | 3424.145 |
| Zn (ppm)                  | 0.20  | 31.940  | 119.500  |
| Mn (ppm)                  | 3.44  | 127.775 | 517.130  |
| Cu (ppm)                  | 0.10  | 13.210  | 46.375   |
| B (ppm)                   | -     | 5.330   | 41.960   |
| Moisture                  | -     | 0.056   | 0.533    |
| Ash                       | -     | 0.058   | 0.148    |
| Fixed Carbon              | -     | 0.607   | 0.111    |
| Volatile Matter           | -     | 0.278   | 0.208    |
| S BET (m <sup>2</sup> /g) | -     | 419.040 | 7.050    |
| O/C                       | -     | 0.058   | 0.069    |
| H/C                       | -     | 0.188   | 0.138    |

**Supplementary Table S2:** Primers used in this study.

| Gene target | Primer | Oligonucleotide sequence (5' – 3') | Reference            |
|-------------|--------|------------------------------------|----------------------|
| 16S rRNA    | 515F-Y | GTGYCAGCMGCCGCGGTAA                | Parada et al., 2016  |
|             | 806RB  | GGACTACNVGGGTWTCTAAT               | Apprill et al., 2015 |

**Supplementary Table S3:** Alpha diversity metrics of prokaryote communities in soil. Values are mean ± SE. Different letters represent significant differences at  $p < 0.05$  between treatments using Dunn’s pairwise comparison test.

| Plant application | Biochar type | Loading percent | N | Richness                     |                               | Diversity              |                       |
|-------------------|--------------|-----------------|---|------------------------------|-------------------------------|------------------------|-----------------------|
|                   |              |                 |   | Observed                     | Chao1                         | Shannon                | Simpson               |
| Soil              | No Biochar   | 0               | 8 | 160.62 ± 17.74 <b>de</b>     | 163.53 ± 18.07 <b>de</b>      | 4.54 ± 0.18 <b>a</b>   | 0.98 ± 0.01 <b>ab</b> |
|                   | Wood         | 5               | 4 | 156.5 ± 4.29 <b>def</b>      | 156.58 ± 4.3 <b>def</b>       | 4.71 ± 0.07 <b>ab</b>  | 0.99 ± 0 <b>ab</b>    |
|                   |              | 10              | 4 | 205.5 ± 41.19 <b>abdefg</b>  | 208.23 ± 42.03 <b>abdefg</b>  | 4.92 ± 0.22 <b>abc</b> | 0.99 ± 0 <b>ab</b>    |
|                   | Manure       | 5               | 4 | 211.75 ± 54.36 <b>abdefg</b> | 214.21 ± 55.8 <b>abdefg</b>   | 4.86 ± 0.31 <b>abc</b> | 0.99 ± 0 <b>ab</b>    |
|                   |              | 10              | 4 | 279.5 ± 28.56 <b>abc</b>     | 290.66 ± 29.87 <b>abc</b>     | 4.91 ± 0.28 <b>abc</b> | 0.98 ± 0.01 <b>a</b>  |
| Crimson           | No Biochar   | 0               | 8 | 138.75 ± 14.71 <b>d</b>      | 139.31 ± 14.74 <b>d</b>       | 4.58 ± 0.14 <b>a</b>   | 0.98 ± 0 <b>ab</b>    |
| Clover            | Wood         | 5               | 4 | 244.5 ± 44.79 <b>abcefg</b>  | 249.81 ± 45.98 <b>abcefg</b>  | 5.17 ± 0.21 <b>bc</b>  | 0.99 ± 0 <b>b</b>     |
|                   |              | 10              | 4 | 160.5 ± 21.27 <b>defg</b>    | 162.1 ± 22.04 <b>defg</b>     | 4.64 ± 0.17 <b>ab</b>  | 0.98 ± 0 <b>a</b>     |
|                   | Manure       | 5               | 4 | 340.5 ± 31.05 <b>ac</b>      | 355.18 ± 34.97 <b>ac</b>      | 5.45 ± 0.08 <b>c</b>   | 0.99 ± 0 <b>b</b>     |
|                   |              | 10              | 4 | 266.75 ± 32.22 <b>abcg</b>   | 278.02 ± 35.48 <b>abcg</b>    | 4.94 ± 0.12 <b>abc</b> | 0.98 ± 0 <b>ab</b>    |
| Italian           | No Biochar   | 0               | 8 | 186.62 ± 16.55 <b>bdefg</b>  | 188.98 ± 16.78 <b>bdefg</b>   | 4.72 ± 0.19 <b>ab</b>  | 0.98 ± 0.01 <b>ab</b> |
| Ryegrass          | Wood         | 5               | 4 | 216 ± 19.98 <b>abcdefg</b>   | 217.95 ± 20.11 <b>abcdefg</b> | 5 ± 0.15 <b>abc</b>    | 0.99 ± 0 <b>ab</b>    |
|                   |              | 10              | 4 | 151 ± 30.47 <b>def</b>       | 152.06 ± 31.1 <b>def</b>      | 4.58 ± 0.27 <b>ab</b>  | 0.98 ± 0 <b>a</b>     |
|                   | Manure       | 5               | 4 | 372 ± 21.43 <b>c</b>         | 388.67 ± 24.26 <b>c</b>       | 5.51 ± 0.1 <b>c</b>    | 0.99 ± 0 <b>b</b>     |
|                   |              | 10              | 4 | 250.25 ± 27.42 <b>abcfg</b>  | 261.46 ± 29.96 <b>abcfg</b>   | 4.86 ± 0.19 <b>ab</b>  | 0.98 ± 0.01 <b>ab</b> |

**Supplementary Table S4:** Physicochemical properties of the soil samples used in this study. Different letters represent significant differences at  $p < 0.05$  between treatments using Dunn's pairwise comparison test. EC = Electrical conductivity; Mg = magnesium; K = potassium concentration; Na = sodium concentration; Ca = Calcium; NO<sub>3</sub> = Nitrate.

| Plant       | Biochar | Loading | N | pH                              | EC                         | NO <sub>3</sub>        | P                        | K                               | Ca                         | Mg                        | Na                        |
|-------------|---------|---------|---|---------------------------------|----------------------------|------------------------|--------------------------|---------------------------------|----------------------------|---------------------------|---------------------------|
| application | type    | percent |   |                                 | (μmho/cm)                  | (ppm)                  | (ppm)                    | (ppm)                           | (ppm)                      | (ppm)                     | (ppm)                     |
| Bare        | No      | 0       | 8 | 7.88 ± 0.06 <b>de</b>           | 168 ± 26.7 <b>c</b>        | 4.62 ± 0.75 <b>ab</b>  | 27.5 ± 7.59 <b>bcd</b>   | 200.75 ± 36.99 <b>def</b>       | 1158.62 ± 52.24 <b>bcd</b> | 103.5 ± 11.1 <b>bc</b>    | 24.88 ± 6.67 <b>ef</b>    |
| Soil        | Biochar |         |   |                                 |                            |                        |                          |                                 |                            |                           |                           |
|             |         | Wood    | 5 | 4                               | 8.07 ± 0.05 <b>def</b>     | 111.25 ± 3.01 <b>c</b> | 1.25 ± 0.95 <b>cd</b>    | 16 ± 2.27 <b>bcd</b>            | 184.5 ± 13.16 <b>def</b>   | 1066 ± 74.32 <b>bcd</b>   | 84.75 ± 5.63 <b>c</b>     |
|             |         | 10      | 4 | 8.3 ± 0.04 <b>abcd</b> <b>f</b> | 130 ± 2.8 <b>bcd</b>       | 1.75 ± 0.85 <b>acd</b> | 12.75 ± 0.48 <b>c</b>    | 218.5 ± 8.26 <b>abcd</b>        | 967.75 ± 32.28 <b>de</b>   | 78.25 ± 2.1 <b>c</b>      | 33.25 ± 4.89 <b>cdef</b>  |
|             | Manure  | 5       | 4 | 8.95 ± 0.03 <b>abc</b>          | 1110.75 ± 202.79 <b>ab</b> | 7 ± 1.08 <b>ab</b>     | 327.25 ± 2.78 <b>ab</b>  | 1619 ± 27.13 <b>abc</b>         | 2150 ± 77 <b>abc</b>       | 566 ± 11.16 <b>ab</b>     | 243.5 ± 18.18 <b>abcd</b> |
|             |         | 10      | 4 | 9.45 ± 0.05 <b>a</b>            | 1553.75 ± 256.02 <b>a</b>  | 3.25 ± 1.38 <b>abc</b> | 617.75 ± 39.34 <b>a</b>  | 2896.25 ± 110.66 <b>a</b>       | 2756.75 ± 112.56 <b>a</b>  | 999 ± 48.55 <b>a</b>      | 456.25 ± 24.01 <b>ab</b>  |
|             | Crimson | No      | 0 | 8                               | 7.69 ± 0.05 <b>e</b>       | 139 ± 7.51 <b>cd</b>   | 1.12 ± 0.55 <b>cd</b>    | 15.5 ± 1.99 <b>c</b>            | 142.62 ± 9.35 <b>ef</b>    | 1105.75 ± 28.8 <b>bcd</b> | 92.62 ± 4.5 <b>bc</b>     |
| Clover      | Biochar |         |   |                                 |                            |                        |                          |                                 |                            |                           |                           |
|             |         | Wood    | 5 | 4                               | 8.18 ± 0.05 <b>cdef</b>    | 122.5 ± 3.8 <b>c</b>   | 0.5 ± 0.29 <b>cd</b>     | 15.5 ± 2.63 <b>cd</b>           | 185.25 ± 13.35 <b>def</b>  | 1034.5 ± 43.13 <b>cde</b> | 84.25 ± 5.44 <b>c</b>     |
|             |         | 10      | 4 | 8.25 ± 0.03 <b>bcd</b> <b>f</b> | 121.75 ± 2.17 <b>c</b>     | 0.5 ± 0.29 <b>cd</b>   | 12.5 ± 0.96 <b>c</b>     | 206 ± 11.25 <b>bcd</b> <b>e</b> | 943 ± 39.91 <b>de</b>      | 76 ± 3.56 <b>c</b>        | 34 ± 3.27 <b>cdef</b>     |
|             | Manure  | 5       | 4 | 8.82 ± 0.09 <b>ab</b> <b>cf</b> | 1162.25 ± 201.55 <b>ab</b> | 9 ± 1.41 <b>b</b>      | 330.25 ± 11.78 <b>ab</b> | 1605.25 ± 49.84 <b>abc</b>      | 2185 ± 62.32 <b>ab</b>     | 565.5 ± 15.61 <b>ab</b>   | 243.5 ± 20.02 <b>abcd</b> |

|          |         |      |   |                            |                              |                           |                            |                               |                               |                             |                             |
|----------|---------|------|---|----------------------------|------------------------------|---------------------------|----------------------------|-------------------------------|-------------------------------|-----------------------------|-----------------------------|
|          |         | 10   | 4 | 9.38 ± 0.1 <b>ab</b>       | 1375 ±<br>325.37 <b>a</b>    | 3 ±<br>1.47 <b>abcd</b>   | 618.75 ±<br>20.75 <b>a</b> | 2795.25 ±<br>55 <b>ac</b>     | 2768.25 ±<br>89.16 <b>a</b>   | 967.5 ±<br>24.87 <b>a</b>   | 415.5 ±<br>10.17 <b>abc</b> |
| Italian  | No      | 0    | 8 | 7.74 ± 0.07 <b>e</b>       | 129.75 ±<br>6.62 <b>c</b>    | 0.25 ±<br>0.16 <b>d</b>   | 14.88 ±<br>1.95 <b>c</b>   | 134.5 ±<br>7.33 <b>f</b>      | 1048.75 ±<br>30.25 <b>de</b>  | 88.62 ±<br>3.44 <b>c</b>    | 16.62 ±<br>2.15 <b>e</b>    |
| Ryegrass | Biochar |      |   |                            |                              |                           |                            |                               |                               |                             |                             |
|          |         | Wood | 5 | 4                          | 8.2 ± 0.04 <b>cdef</b>       | 116.25 ±<br>5.41 <b>c</b> | 0.25 ±<br>0.25 <b>cd</b>   | 12 ± 0.71 <b>c</b>            | 160.25 ±<br>8.13 <b>def</b>   | 946 ±<br>45.84 <b>de</b>    | 78.25 ±<br>3.71 <b>c</b>    |
|          |         | 10   | 4 | 8.3 ±<br>0.04 <b>abcdf</b> | 125.25 ±<br>4.99 <b>c</b>    | 0.5 ±<br>0.29 <b>cd</b>   | 14.25 ±<br>1.31 <b>cd</b>  | 223.25 ±<br>15.76 <b>abcd</b> | 896.5 ±<br>11.91 <b>e</b>     | 78.25 ±<br>3.61 <b>c</b>    | 35.25 ±<br>4.29 <b>bcdf</b> |
|          | Manure  | 5    | 4 | 8.85 ±<br>0.06 <b>abcf</b> | 843 ±<br>83.09 <b>abd</b>    | 0.5 ±<br>0.29 <b>cd</b>   | 324.5 ±<br>12.9 <b>abd</b> | 1555.75 ±<br>37.39 <b>abc</b> | 2172.25 ±<br>62.69 <b>abc</b> | 564.25 ±<br>15.69 <b>ab</b> | 230.25 ±<br>9.9 <b>abcd</b> |
|          |         | 10   | 4 | 9.4 ± 0.04 <b>ab</b>       | 1574.75 ±<br>230.12 <b>a</b> | 0.75 ±<br>0.25 <b>cd</b>  | 626.25 ±<br>32.33 <b>a</b> | 2957.75 ±<br>45.81 <b>a</b>   | 2807.5 ±<br>108.49 <b>a</b>   | 1011.25 ±<br>43.27 <b>a</b> | 481.5 ±<br>19.96 <b>a</b>   |

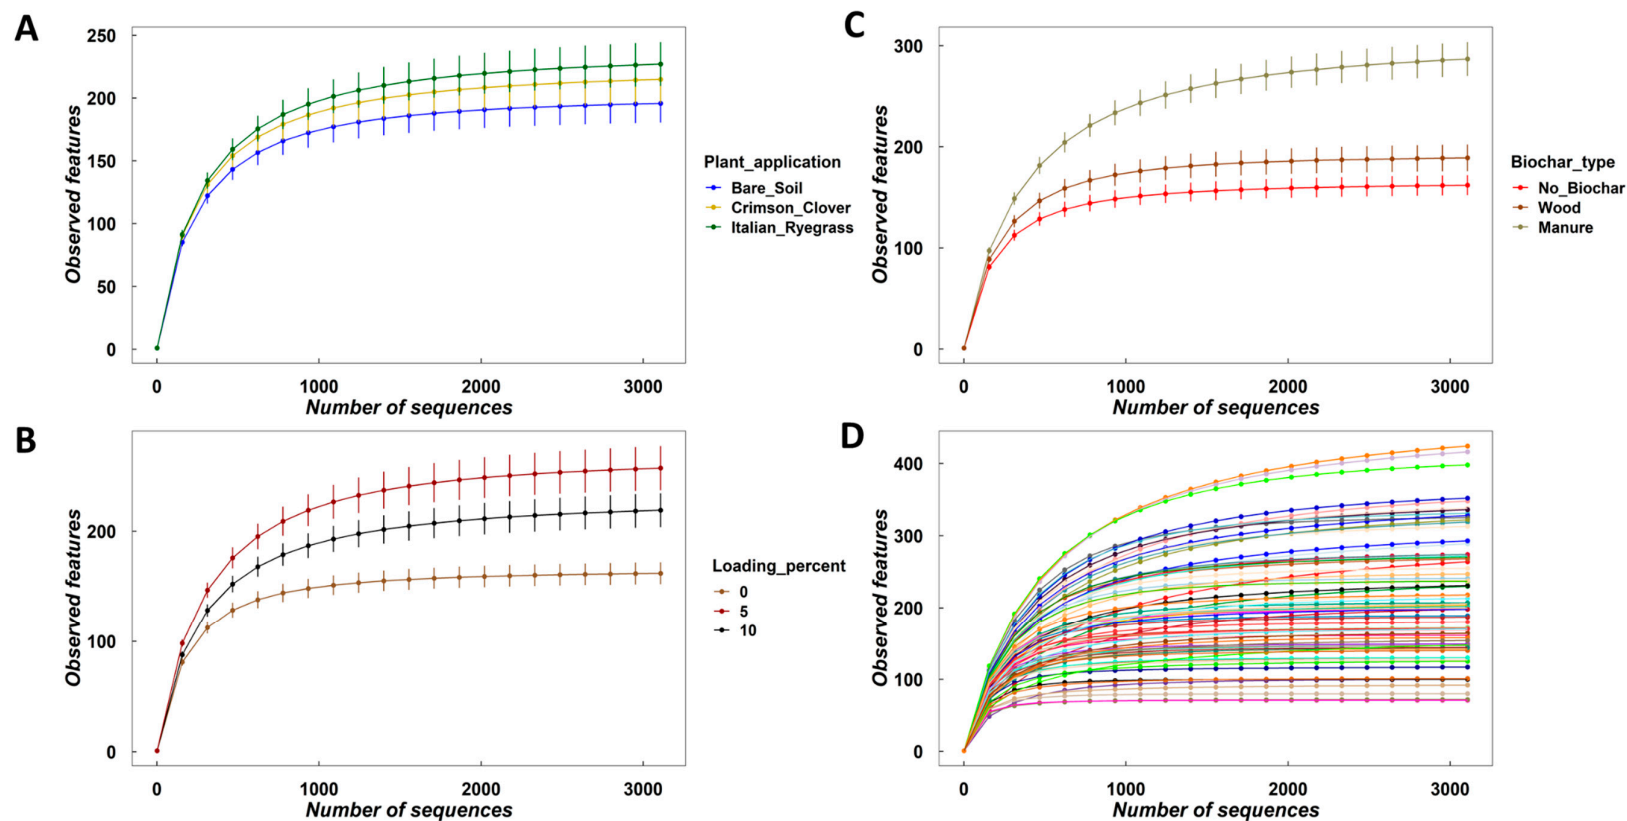

**Supplementary Figure S1:** Sample rarefaction curves depicting the richness (y-axis, as the number of unique ASVs recovered) determined at an equal sampling effort (x-axis, the number of individual sequences recovered in each sample) of prokaryotes in the soil. A. Comparison of bare soil (no crop), crimson clover, and Italian ryegrass. B. Comparison of different biochar loading percentages. C. Comparison of different biochar types. D. Comparison of individual samples. The rarefaction curves show that the rarefaction depth (3107) chosen in this study was enough to capture the prokaryote diversity of our soil samples.

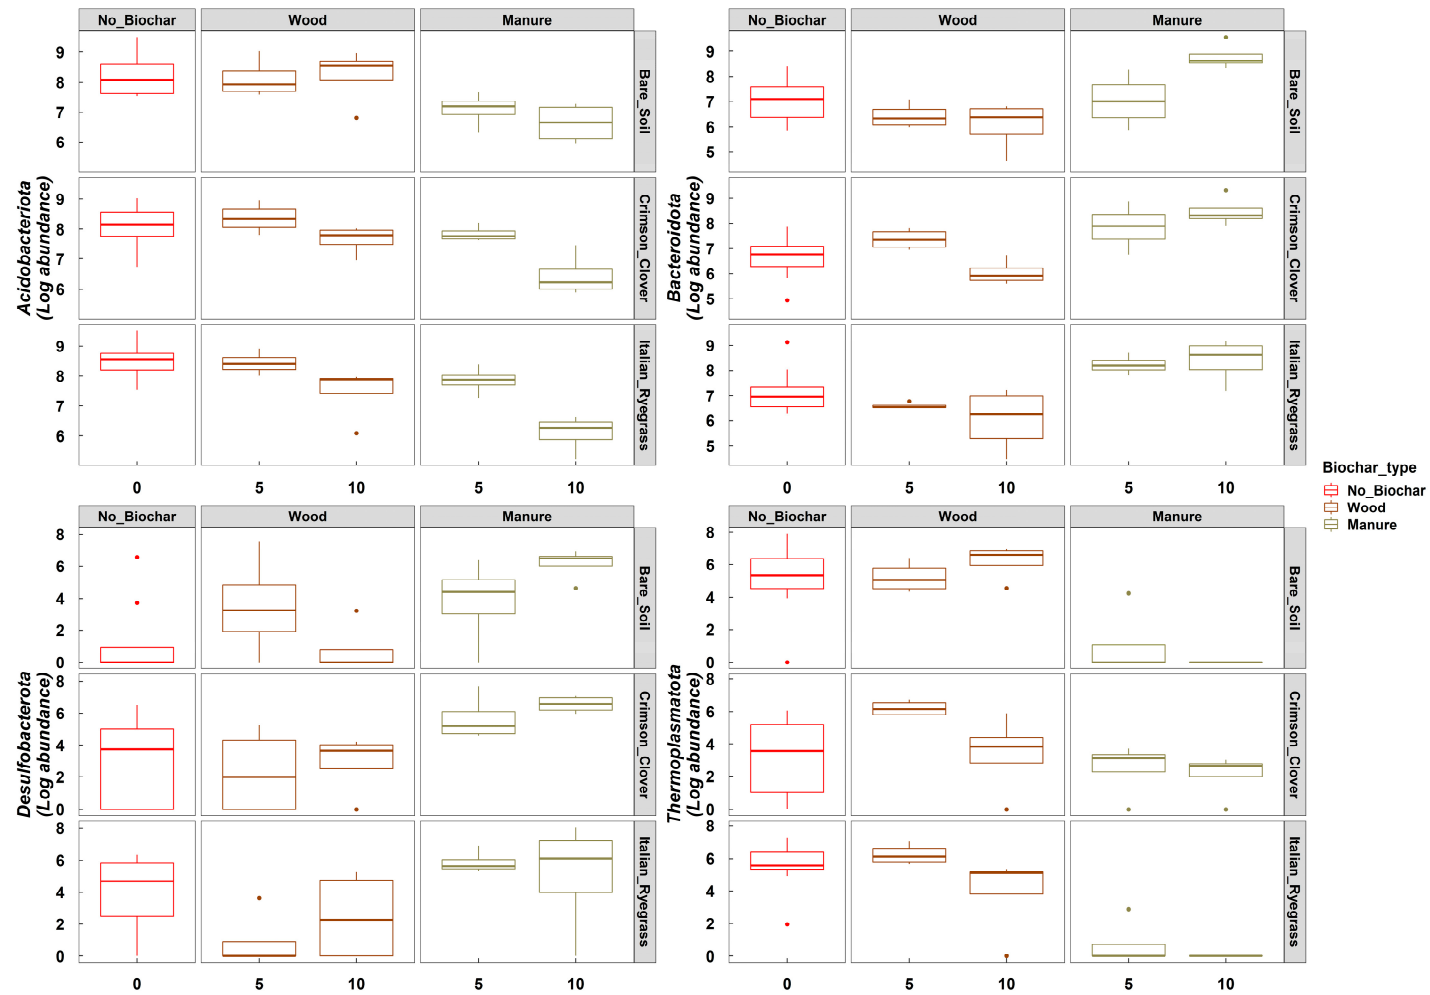

**Supplementary Figure S2:** Differentially abundant soil prokaryote phyla detected using ANCOM. On the x-axis is the biochar loading rate and the Y-axis the natural log abundance of the differentially abundant prokaryote phylum; n=4. Boxes represent 25-75% of the data, solid lines the median, the tips represent the minimum and maximum values excluding the outliers (1.5 times lesser or greater than the lower or upper quantiles) represented by dots outside of the boxes.

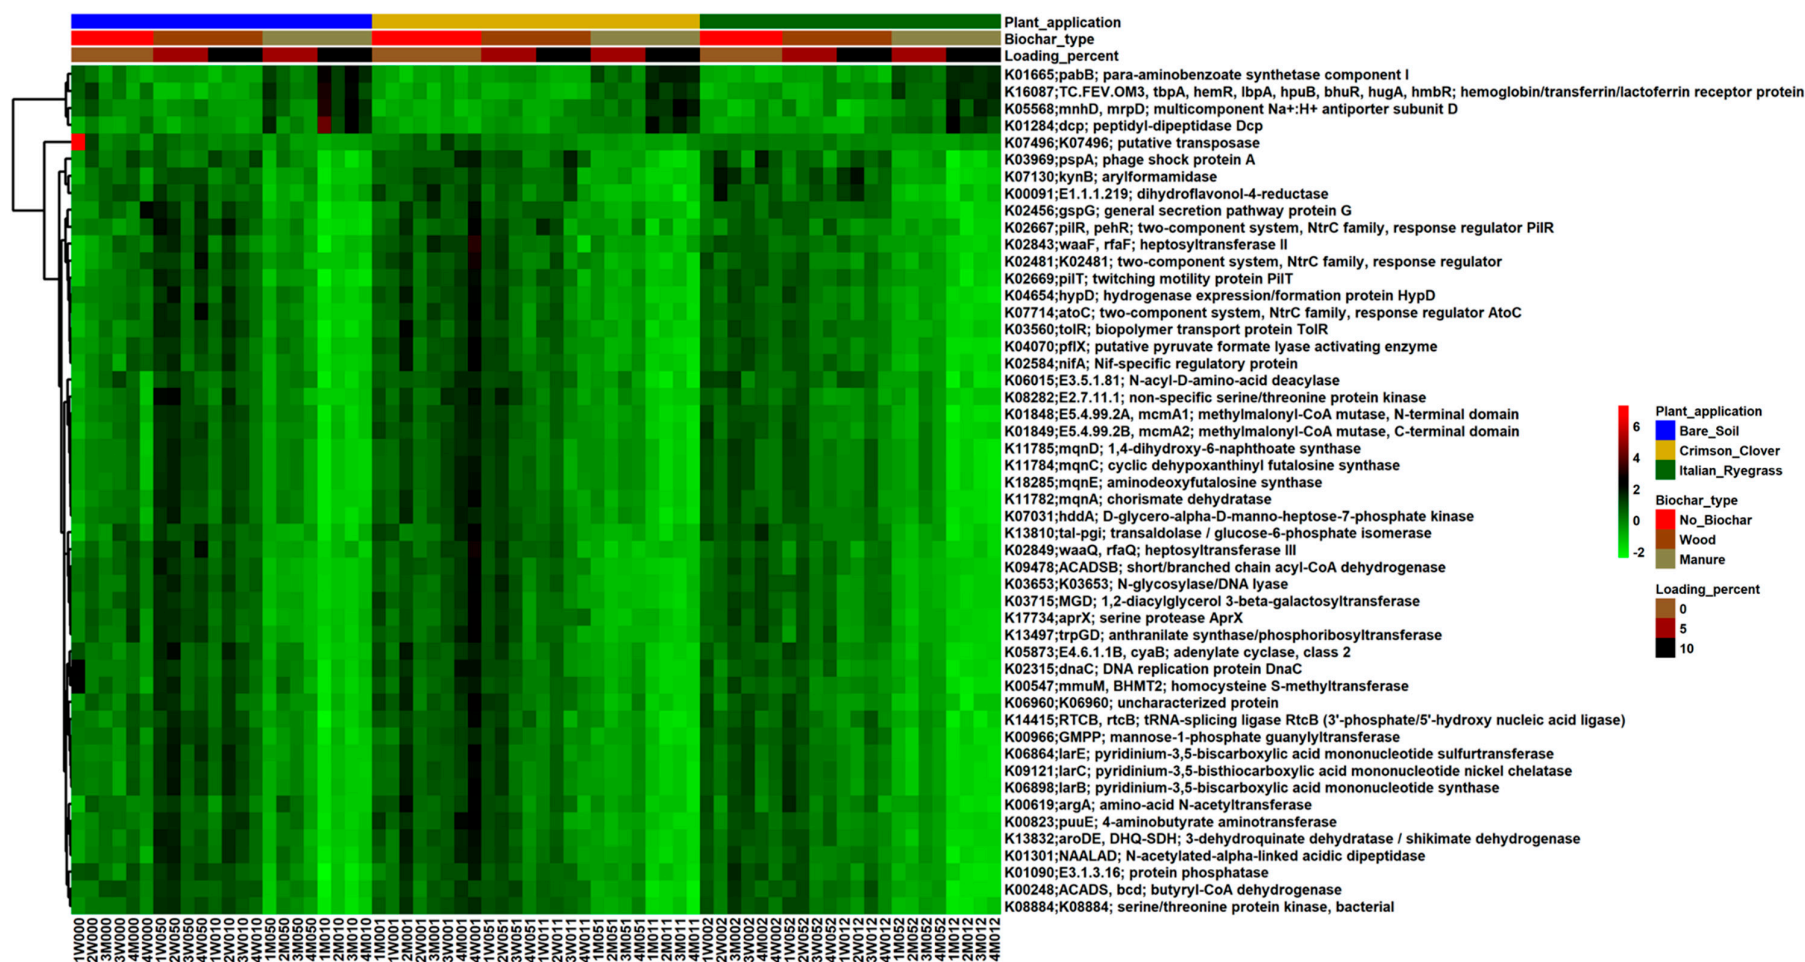

**Supplementary Figure S3:** Heatmap showing the difference in gene patterns observed between treatments for the fifty most significant genes (fifty lowest adjusted p-values). On the x-axis are samples and on the y-axis are hierarchically clustered significant genes. Gene abundances were transformed, scaled, and correlated. The heatmap shows that the gene patterns were different between biochar types and loading percent within biochar types.

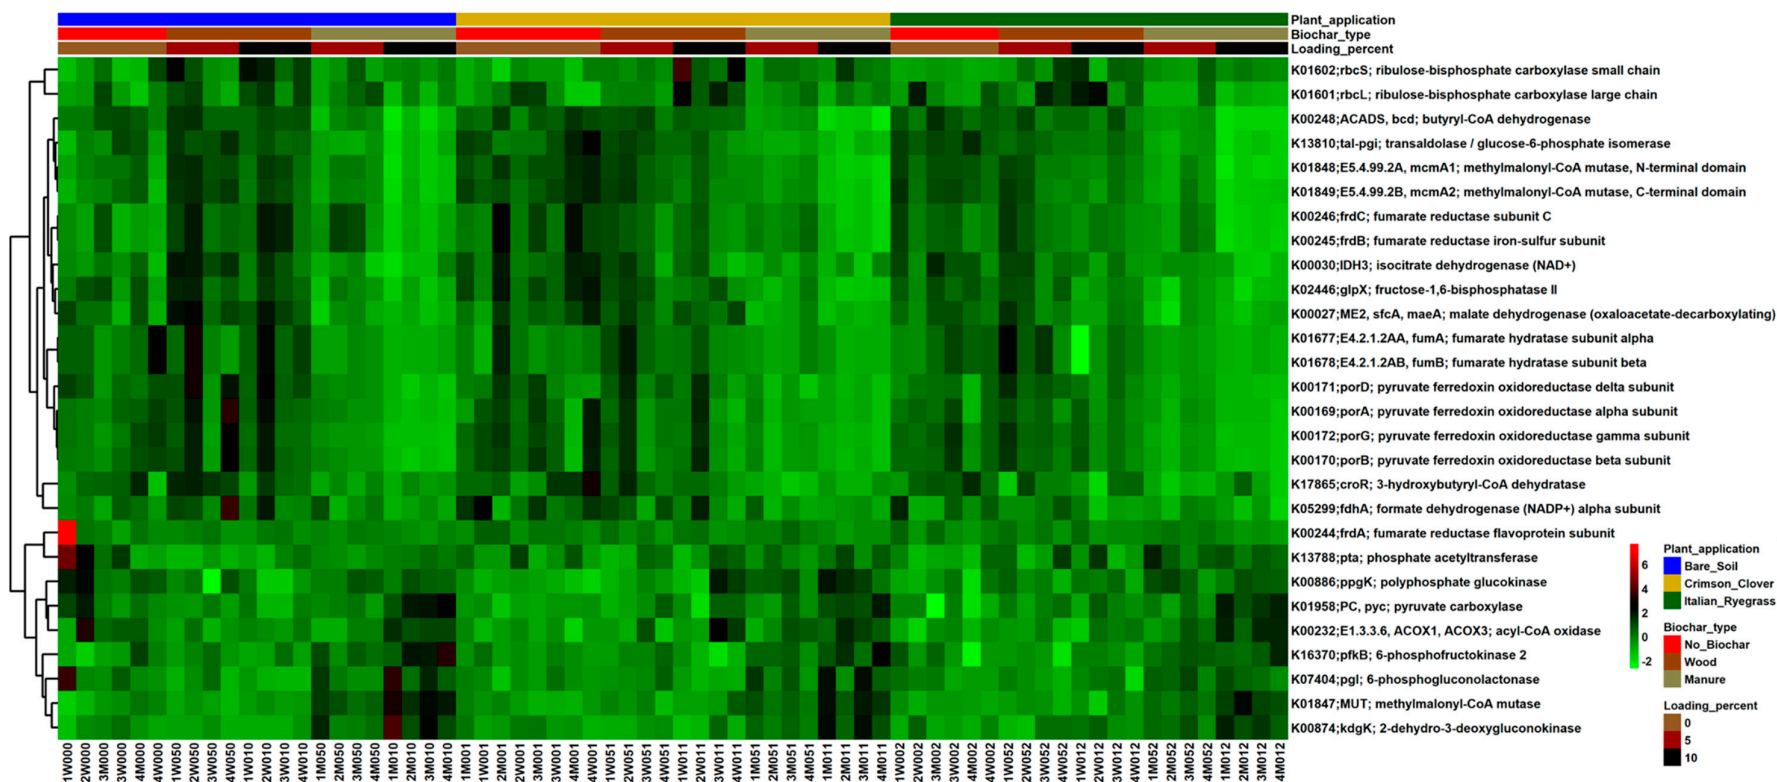

**Supplementary Figure S4:** Heatmap showing the difference in carbon metabolism gene patterns observed between treatments. On the x-axis are samples and on the y-axis are hierarchically clustered significant genes. Gene abundances were transformed, scaled, and correlated. The heatmap shows that the gene patterns were different between biochar types and loading percent within biochar types regardless of crop type.



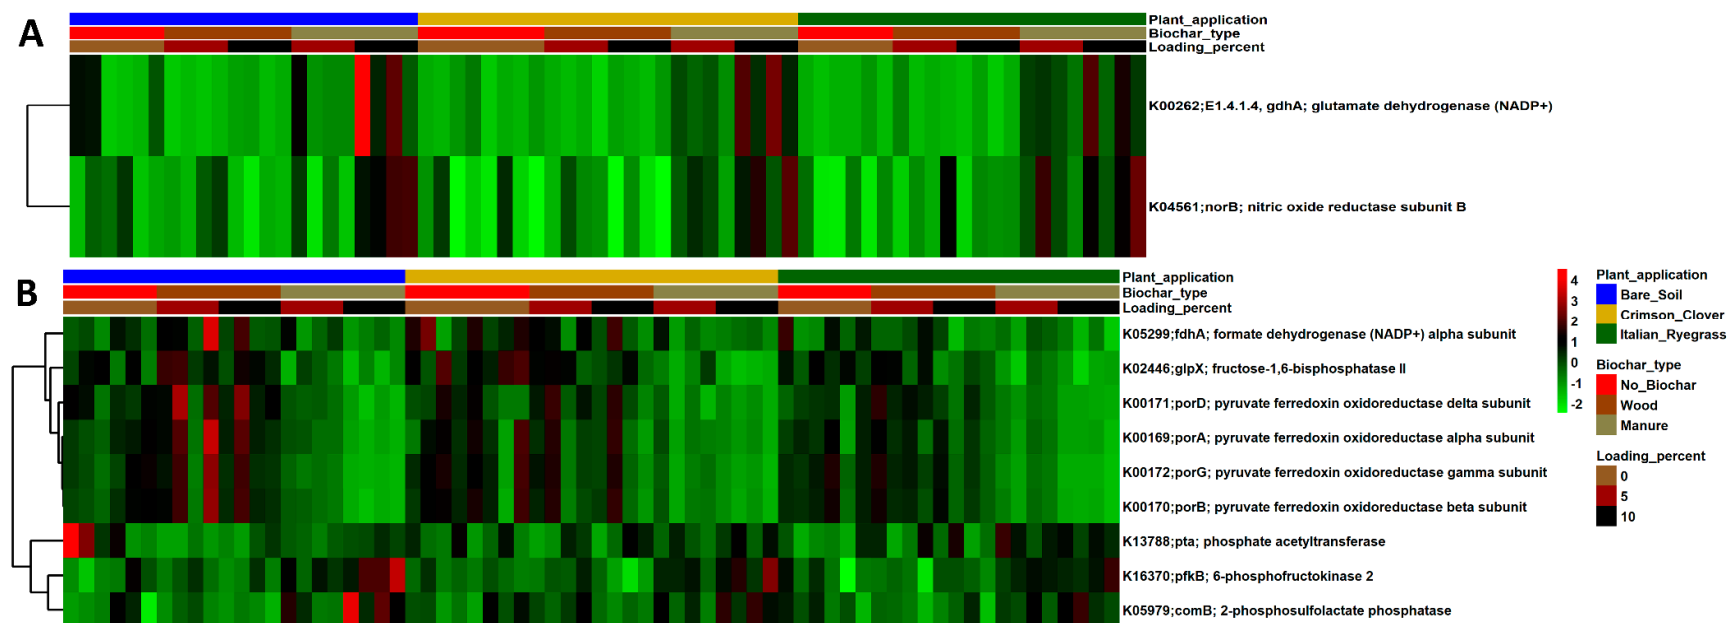

**Supplementary Figure S5:** Heatmap showing the pattern of significantly different (A) nitrogen and (B) methane metabolism genes observed between treatments. On the x-axis are samples and on the y-axis are hierarchically clustered significant genes. Gene abundances were transformed, scaled, and correlated. The heatmap shows that the gene patterns were different between biochar types and loading percent within biochar types irrespective of crop type.

## REFERENCES

A Parada, A. E., D. M. Needham, and J. A. Fuhrman (2016). Every base matters: assessing small subunit rRNA primers for marine microbiomes with mock communities, time series and global field samples. *Environmental Microbiology* 18(5): 1403-1414.

Apprill, A., S. McNally, R. Parsons, and L. Weber (2015). Minor revision to V4 region SSU rRNA 806R gene primer greatly increases detection of SAR11 bacterioplankton. *Aquatic Microbial Ecology* 75(2): 129-137.
